# Supplementary material
Source: Springer Nature journal article supplement (https://www.springermedizin.de/resource/supplementary/12879_2013_2648_MOESM3_ESM.pdf/9444986)

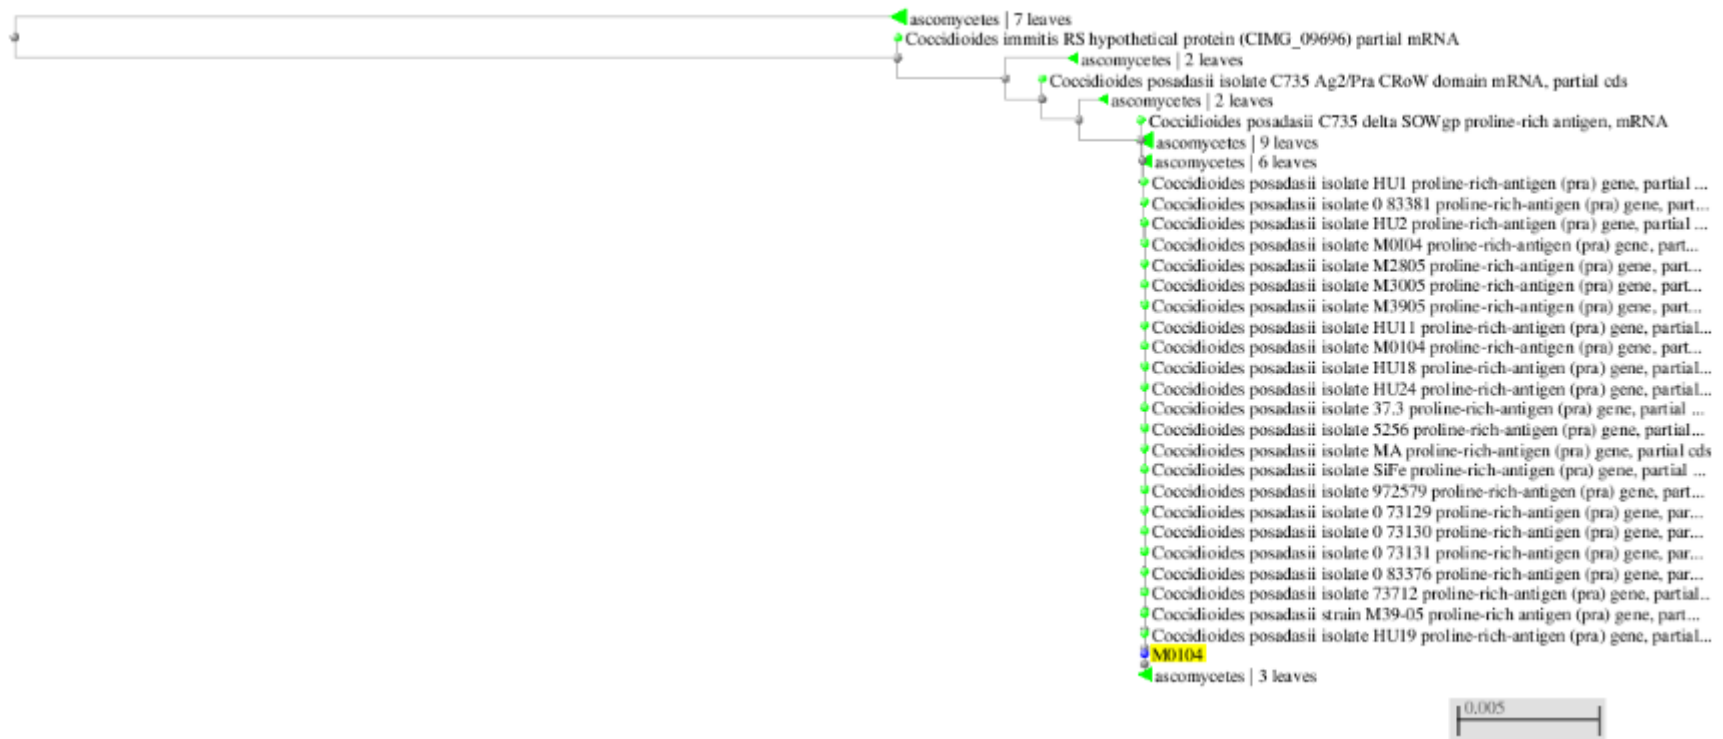

**Additional file 3.** Phylogenetic inference analysis using partial sequences of the *Ag2/PRA* gene.

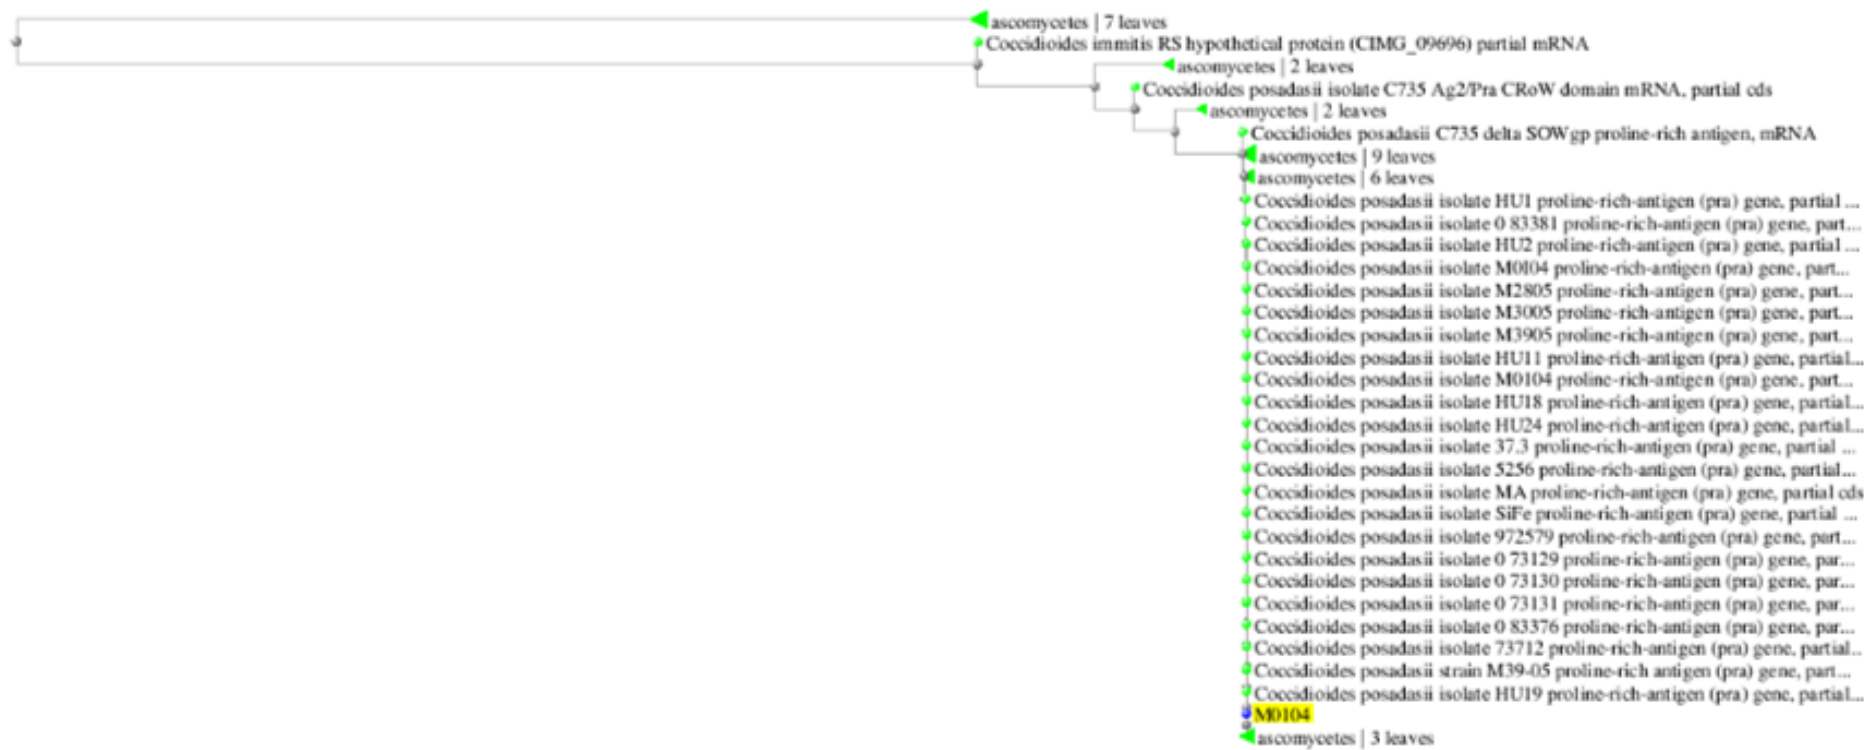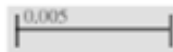

Supplement: MOESM3 [file 9444986]
